# Supplementary material for: Gold nanorod-based smart platform for efficient cellular uptake and combination therapy
Source: Royal Society of Chemistry journal article supplement (doi:10.1039/d4ra06051b), 2024-01-01
Supplement: d4ra06051b1.pdf [file d4ra06051b1.pdf]

### Supplementary information

Gold nanorod-based smart platform for efficient cellular uptake and combination therapy

*Kibeom Kim,<sup>† a</sup> Mamta Ramgopal Chejara,<sup>† a, b, c</sup> Been Yoon<sup>b, c</sup> and Myoung-Hwan Park,<sup>\* a, b, c</sup>*

a. Department of Chemistry and Life Science, Sahmyook University, Seoul 01795, South Korea

b. Department of Convergence Science, Sahmyook University, Seoul 01795, South Korea

c. Convergence Research Center, Nanobiomaterials Institute, Sahmyook University, Seoul 01795, South Korea

<sup>†</sup> These authors contributed equally to this work

\*Corresponding Author: E-mail: [mpark@syu.ac.kr](mailto:mpark@syu.ac.kr)

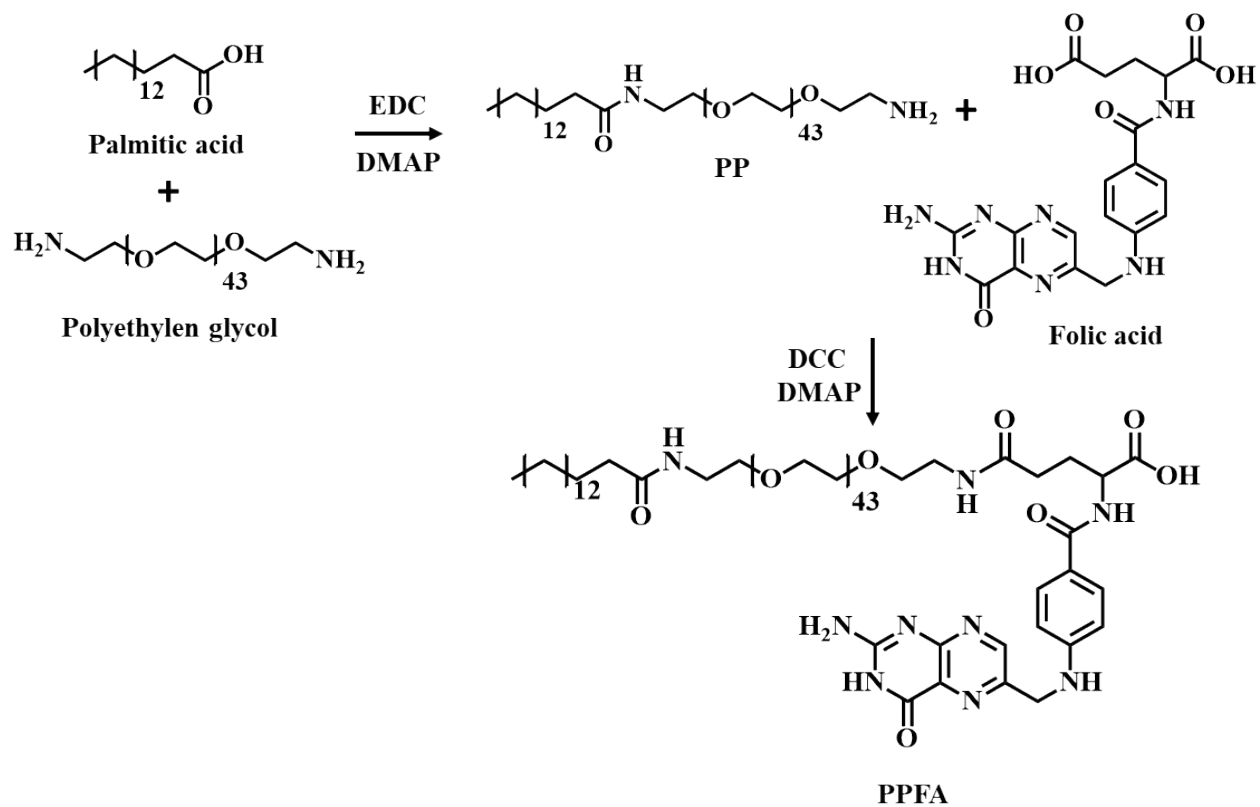

**Scheme S1.** Synthesis scheme of PPFA.

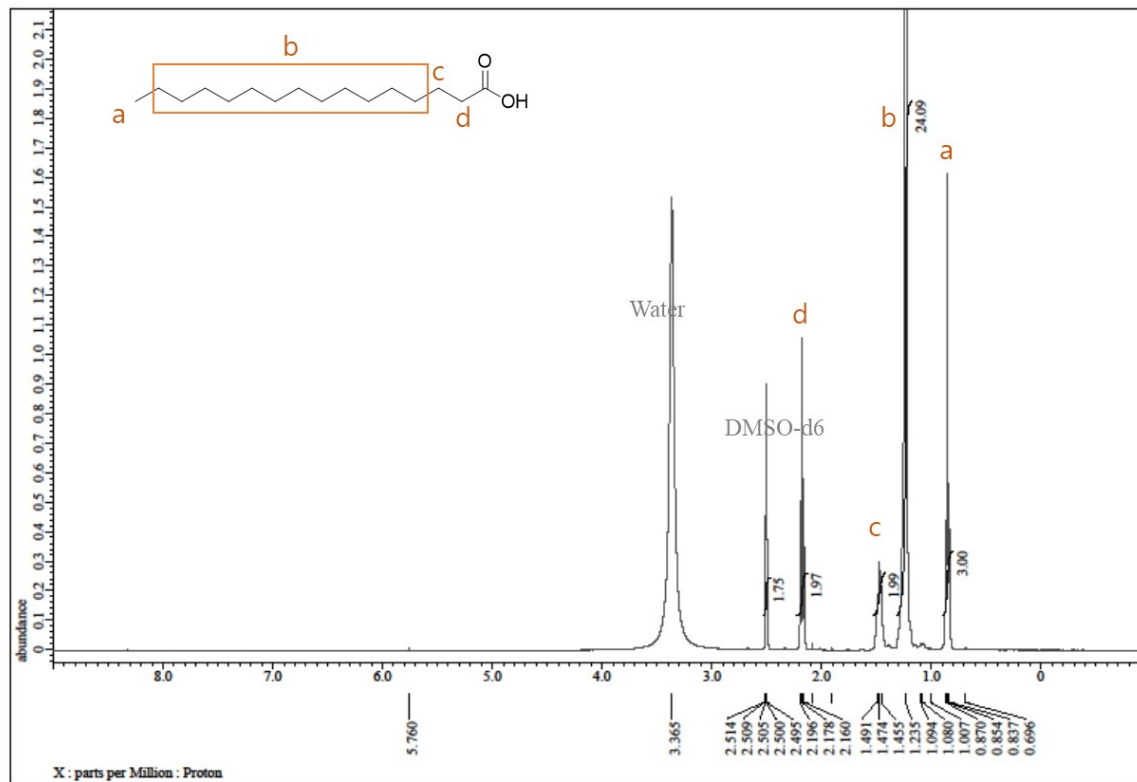

**Figure S1.** <sup>1</sup>H NMR spectral data of palmitic acid

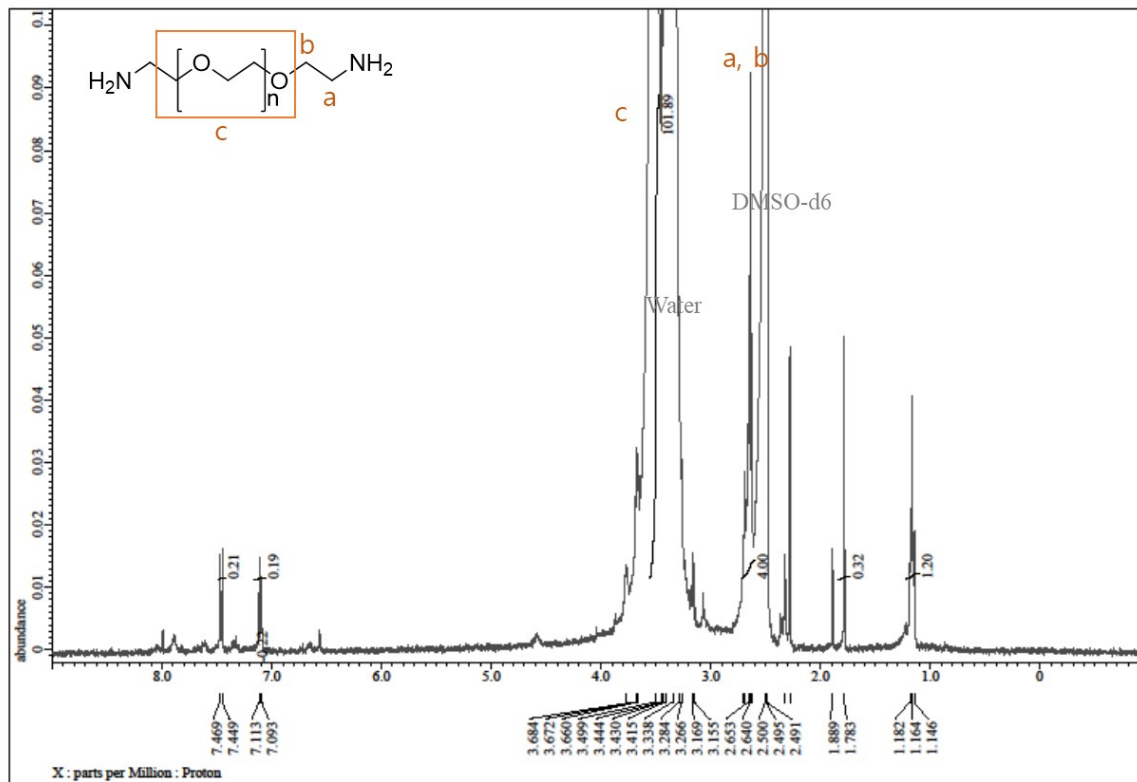

**Figure S2.** <sup>1</sup>H NMR spectral data of polyethylene glycol

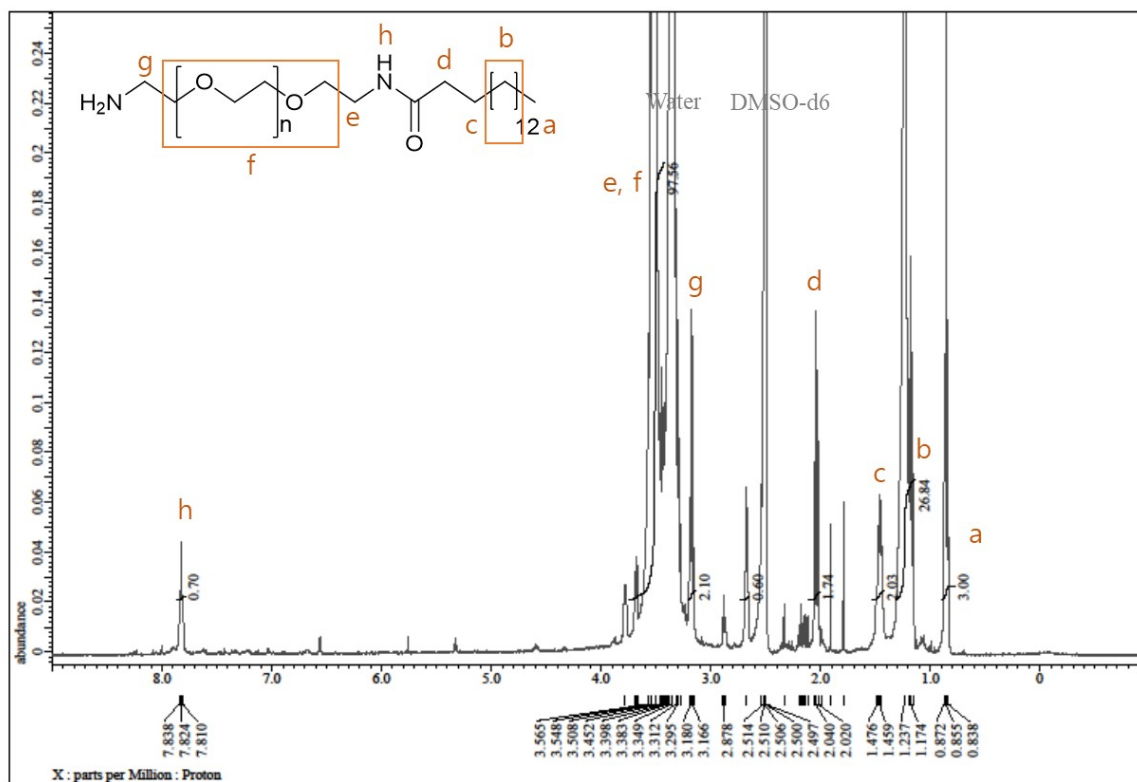

Figure S3. <sup>1</sup>H NMR spectral data of PP

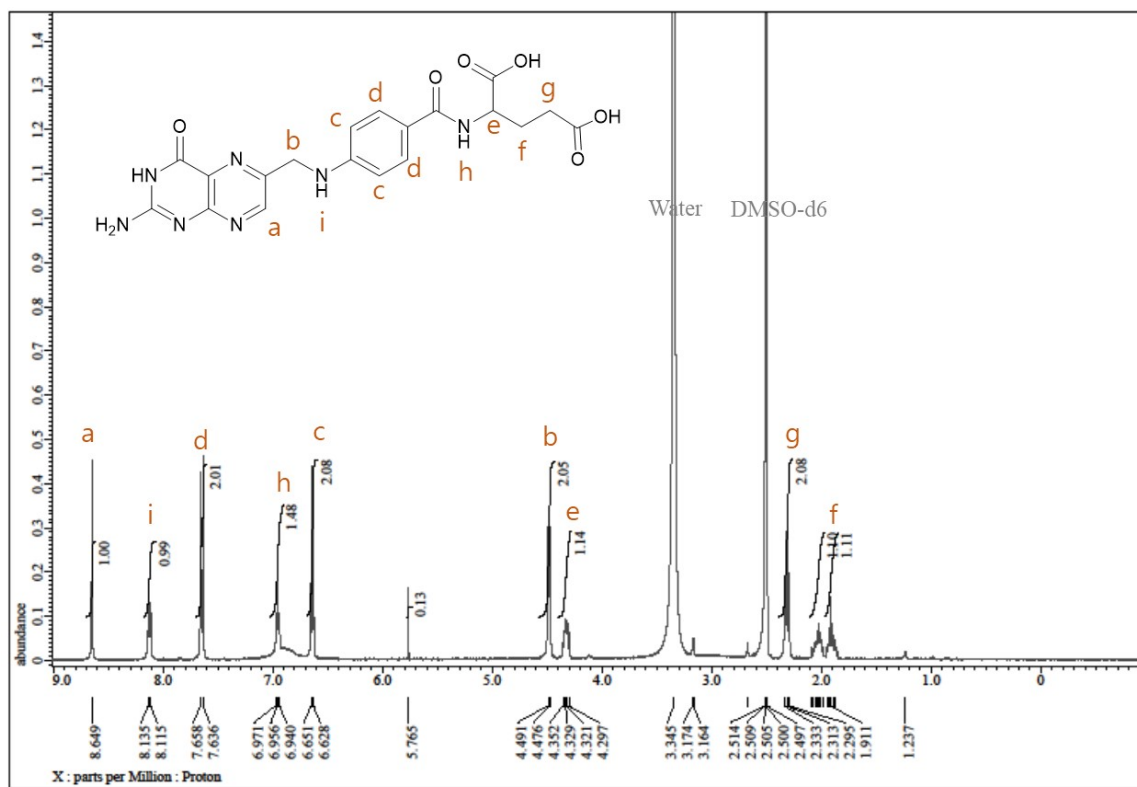

Figure S4. <sup>1</sup>H NMR spectral data of folic acid

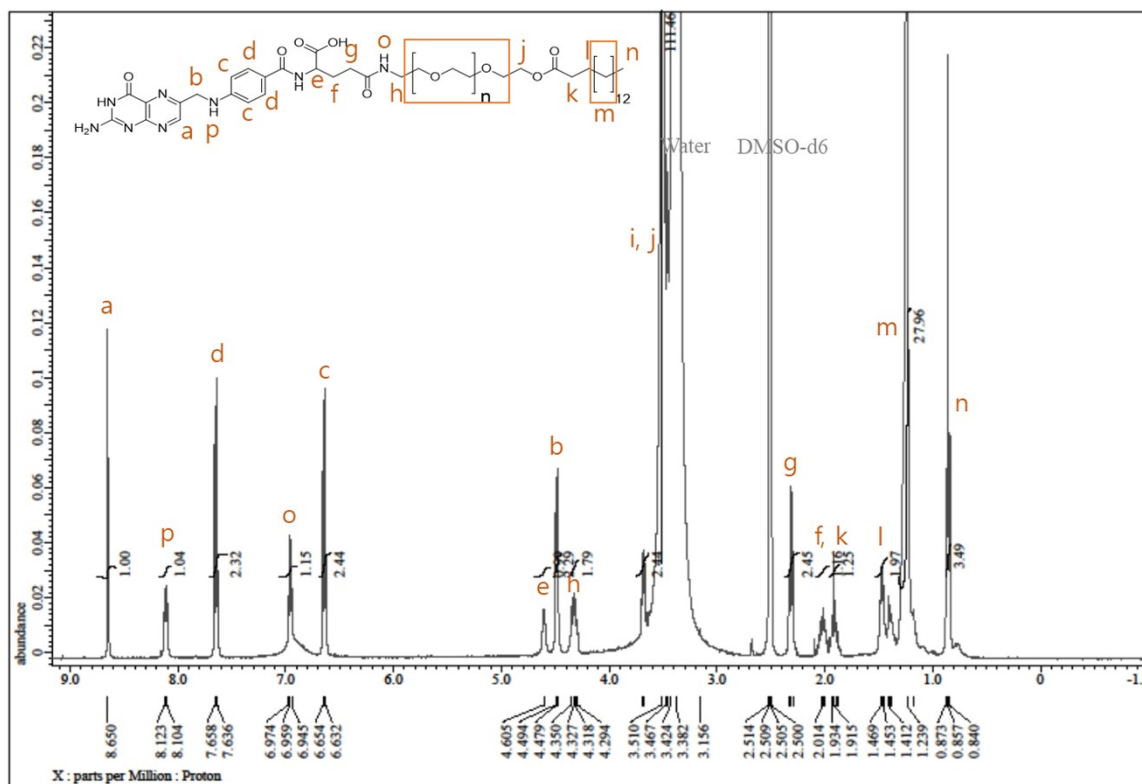

Figure S5. <sup>1</sup>H NMR spectral data of PPFA
